# Supplementary material for: Facile preparation of carbon nitride by binary eutectic KNO 3 /KCl molten salt and its photocatalytic performance evaluation
Source: Royal Society of Chemistry journal article supplement (doi:10.1039/d3ra06718a), 2023-01-01
Supplement: d3ra06718a1.pdf [file d3ra06718a1.pdf]

## Supporting Information

### **Facile preparation of carbon nitride by binary eutectic $\text{KNO}_3/\text{KCl}$ molten salt and its photocatalytic performance evaluation**

Xiaodi Chen,<sup>†a</sup> Shihang Liu,<sup>†a</sup> Tian Xie,<sup>a</sup> Chao Zhang,<sup>\*a</sup> Shiai Xu<sup>a,b</sup>

*a. School of Chemical Engineering, Qinghai University, Xining 810016, Qinghai, China. E-mail: zhangchaoqhu@126.com*

*b. Shanghai Key Laboratory of Advanced Polymeric Materials, Key Laboratory for Ultrafine Materials of Ministry of Education, School of Materials Science and Engineering, East China University of Science and Technology, Shanghai 200237, China. E-mail: saxu@ecust.edu.cn*

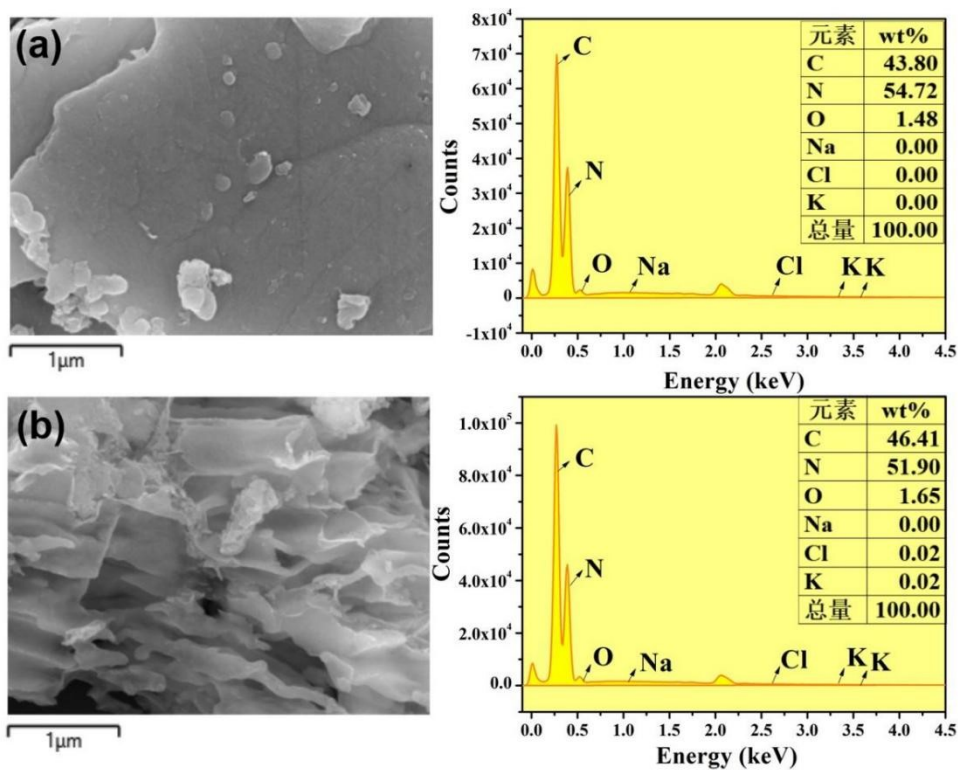

Fig S1 EDS diagram of g-CN (a) and g-CN-A (b) under specific morphology

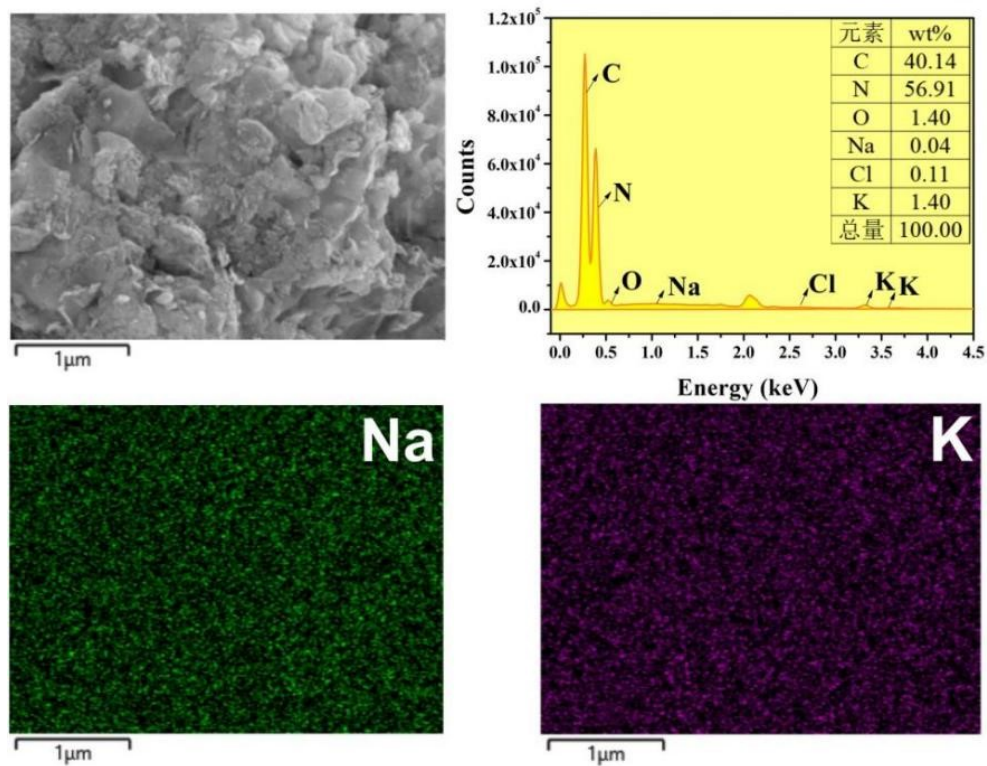

Fig S2 EDS diagram and Na, K element mapping image of g-CN-A-PN/PC-T350

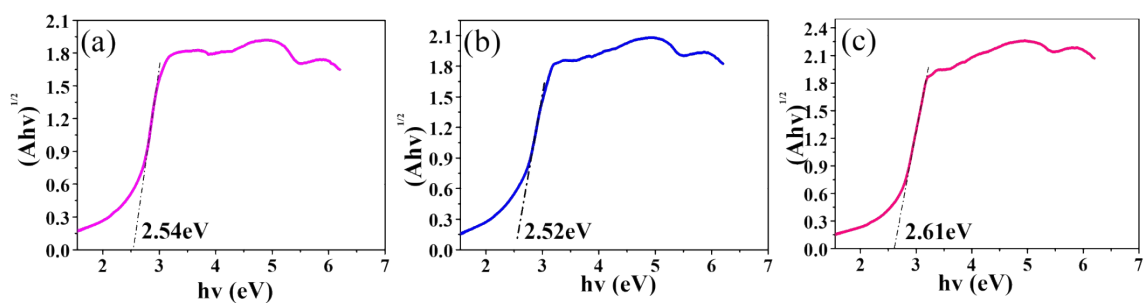

Fig S3 The plots of the square root of the Kubelka-Munk functions against the photon energy: (a) g-CN, (b) g-CN-A, and (c) g-CN-A-PN/PC-T350.

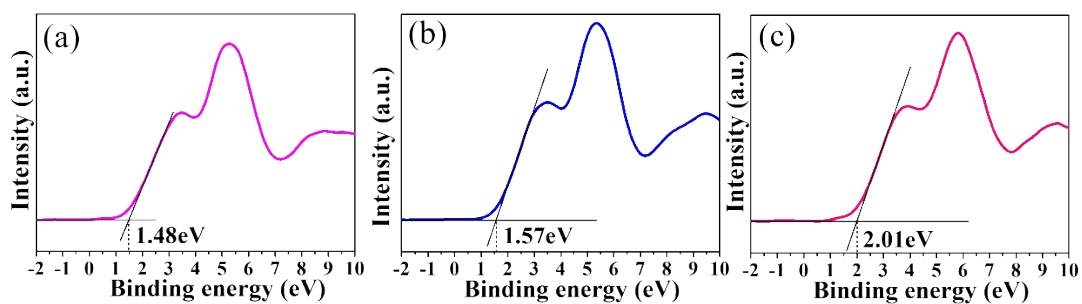

Fig S4 VB XPS of the samples: (a) g-CN, (b) g-CN-A, and (c) g-CN-A-PN/PC-T350.

Table S1 The adsorption capacity of the g-CN-A-PN/PC-T350 for different pollutants.

| Name of dyes          | Adsorption quantity (mg/g) |
|-----------------------|----------------------------|
| RhB                   | 5.71                       |
| Mordant Red 15 dye    | 5.33                       |
| Dinotefuran pesticide | 0.30                       |
| Dodecylmorpholine     | 30.95                      |
